# Supplementary material
Source: PubMed Central journal article supplement (PMC1890363)
Supplement: jphysiol_2006.117754_1.pdf [file jphysiol_2006.117754_1.pdf]

Legend for Supplementary Figure

Supplementary Figure 1: Biceps femoris EMG evoked by slow and fast rates of skin heating (adapted from McMullan & Lumb, 2006).
